# Supplementary material for: Optimizing CuO p-type dye-sensitized solar cells by using a comprehensive electrochemical impedance spectroscopic study
Source: Royal Society of Chemistry journal article supplement (doi:10.1039/c6nr05507a), 2016-01-01
Supplement: c6nr05507a1.pdf [file c6nr05507a1.pdf]

# Optimizing CuO p-type dye-sensitized solar cells by using a comprehensive electrochemical impedance spectroscopic study

*Oliver Langmar, Carolina R. Ganivet, Gema de la Torre, Tomás Torres, Rubén D. Costa\* and  
Dirk M. Guldi\**

Oliver Langmar, Dr. Rubén D. Costa and Prof. Dirk M. Guldi

Department of Chemistry and Pharmacy, Interdisciplinary Center for Molecular Materials,

University of Erlangen-Nürnberg, Egerlandstr. 3, 91058 Erlangen Germany

E-mail: ruben.costa@fau.de, dirk.guldi@fau.de

Carolina R. Ganivet, Dr. Gema de la Torre and Prof. Tomás Torres

Universidad Autónoma de Madrid, and Institute for Advanced Research In Chemical Sciences

(IAdChem), C/Francisco Tomás y Valiente 7, 28049 Madrid, Spain

E-mail: tomas.torres@uam.es

Prof. Tomás Torres Instituto Madrileño de Estudios Avanzados (IMDEA)-Nanociencia c/

Faraday, 9, Cantoblanco, 28049 Madrid, Spain

Keywords: Electrochemical impedance spectroscopy, p-type DSSC, CuO electrodes, Electron  
accepting zinc phthalocyanines, Optimization

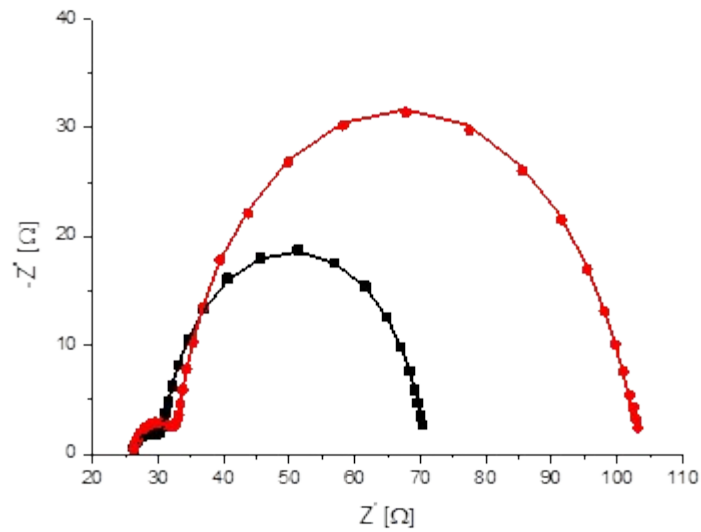

**Figure S1:** Upper part - Nyquist plot (circles) of CuO-DSSCs with the respective Kronig-Kramers test (solid line) under 1 sun illumination (black) and dark (red) recorded at  $V_{oc}$  conditions.

**Table S1:** Respective chi-square values of the Kronig-Kramers test for the imaginary ( $-Z''$ ) and real part ( $Z'$ ) as well as the sum ( $Z$ ) for the measured Nyquist plots under light and dark conditions.

| Measurement condition | $\chi^2 [Z]$          | $\chi^2 [Z']$         | $\chi^2 [-Z'']$       |
|-----------------------|-----------------------|-----------------------|-----------------------|
| light                 | $2.11 \times 10^{-6}$ | $8.00 \times 10^{-7}$ | $1.3 \times 10^{-6}$  |
| dark                  | $9.94 \times 10^{-6}$ | $3.17 \times 10^{-6}$ | $6.77 \times 10^{-6}$ |

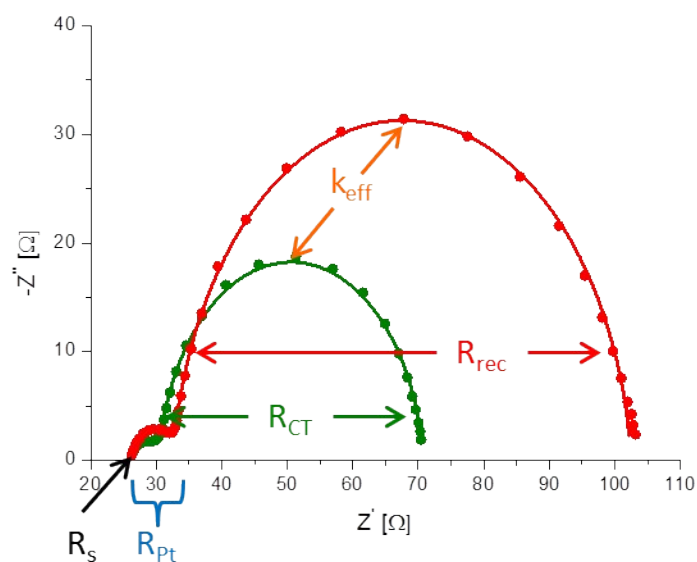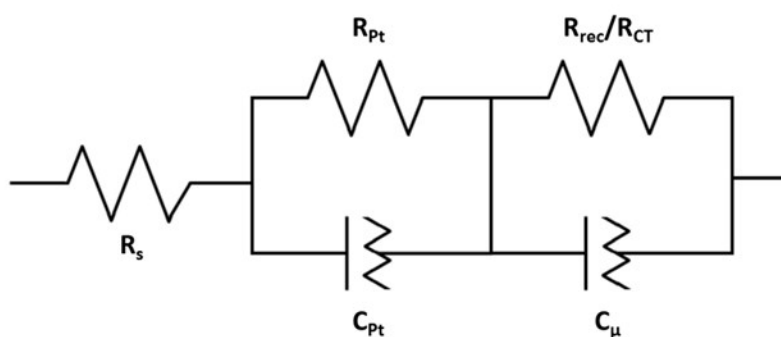

**Figure S2:** Upper part - Nyquist plot (circles) of CuO-DSSCs with the respective fitting (solid line) under 1 sun illumination (green) and dark (red) recorded at  $V_{oc}$  conditions. The resistances and the effective rate constant  $k_{eff}$ , which can be extracted from the Nyquist plots, are shown. Bottom part – Electrical circuit model used for EIS data fitting.

**Table S2:** Fitting results of the exemplary Nyquist plots of Fig S2 with the corresponding percental errors.  $Y_{0,Pt}$ ,  $\alpha_{Pt}$ ,  $Y_{0,\mu}$  and  $\alpha_{\mu}$  are used to calculate the capacitances  $C_{Pt}$  and  $C_{\mu}$  of the constant-phase element – **Equation 2**.

| Measurement condition | $R_s$ [ $\Omega$ ] | $R_{Pt}$ [ $\Omega$ ] | $Y_{0,Pt}$ [ $Ss^\alpha$ ]        | $\alpha_{Pt}$   | $R_{CT/rec}$ [ $\Omega$ ] | $Y_{0,\mu}$ [ $Ss^\alpha$ ]      | $\alpha_{\mu}$  |
|-----------------------|--------------------|-----------------------|-----------------------------------|-----------------|---------------------------|----------------------------------|-----------------|
| light                 | 26.16<br>(0.74%)   | 4.51<br>(6.59%)       | $3.91 \times 10^{-5}$<br>(45.88%) | 0.81<br>(6.05%) | 39.99<br>(0.72%)          | $1.86 \times 10^{-4}$<br>(3.10%) | 0.95<br>(0.67%) |
| dark                  | 27.56<br>(0.56%)   | 6.37<br>(3.66%)       | $1.19 \times 10^{-5}$<br>(29.82%) | 0.92<br>(3.44%) | 69.77<br>(0.50%)          | $2.15 \times 10^{-4}$<br>(2.22%) | 0.94<br>(0.50%) |

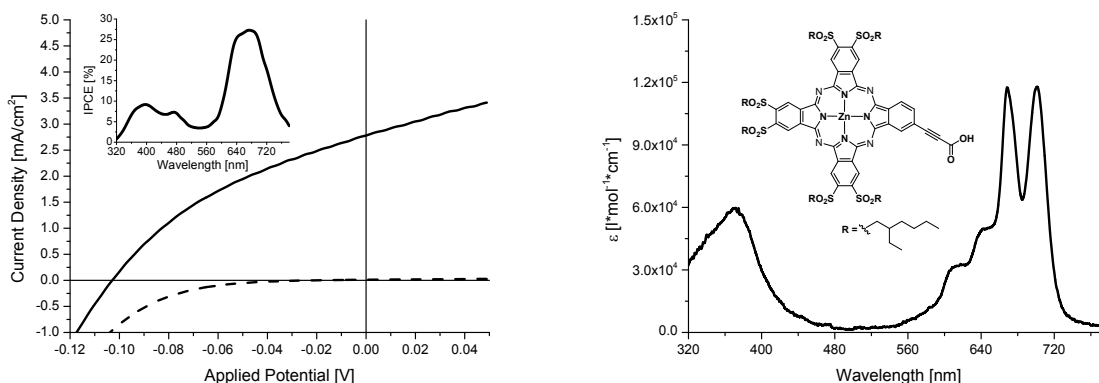

**Figure S3:** Left part: Current density vs. applied voltage under 1 sun and AM 1.5 illumination (line) and dark (dashed) conditions for a p-type CuO DSSC. Inset – IPCE spectra of the corresponding device. Right part: Absorption spectra and molecular structure of the electron-accepting phthalocyanine **ZnPc2**, which was used as a photosensitizer.

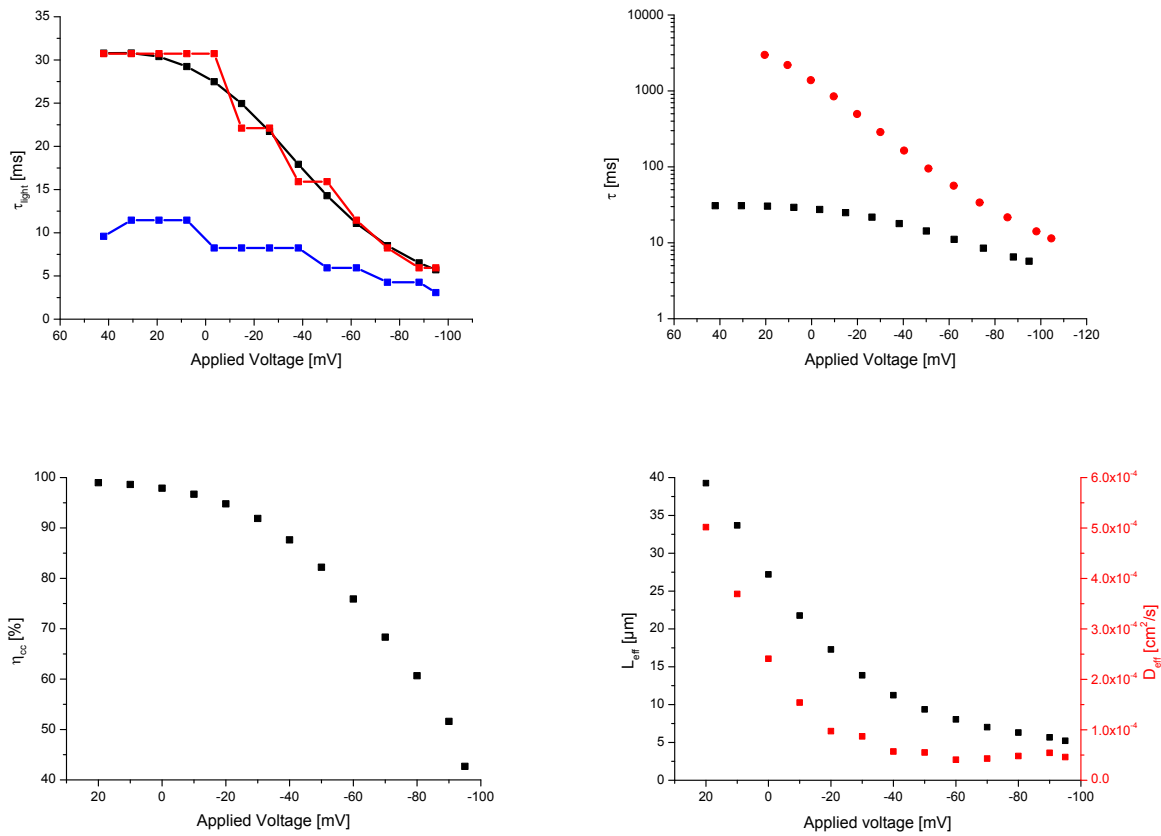

**Figure S4:** Top left – Time constants under light conditions derived via **Equation 3** (black), determined via **Equation 4** / the Nyquist plot maximum frequency (red), and via **Equation 4** / the frequency of the maximum in the bode phase plot (blue). Top right -  $\tau_{light}$  (black) and  $\tau_{dark}$  (red) determined by **Equation 3** for the whole voltage region. Bottom left -  $\eta_{cc}$  vs. applied voltage. Bottom right –  $L_{eff}$  (black) and  $D_{eff}$  (red) vs. applied voltage for a p-type CuO DSSCs.

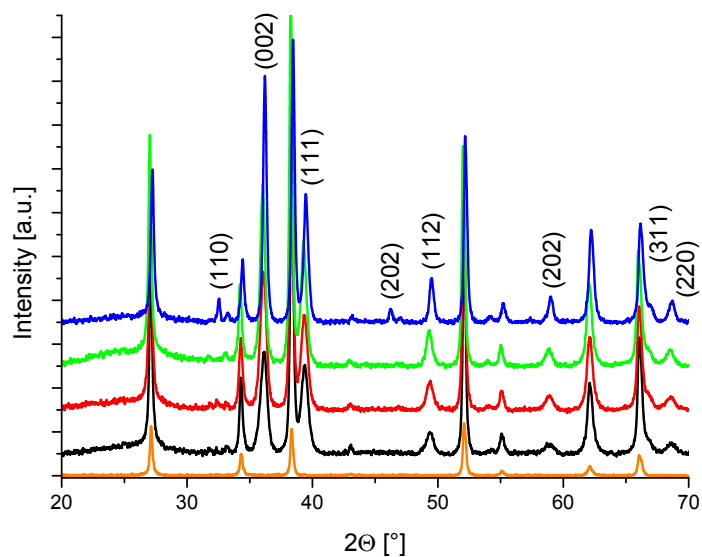

**Figure S5:** XRD spectra of CuO electrodes calcinated at 300, 350, 400, and 500°C in black, red, green, and blue, respectively, with the bare FTO substrate in orange and the corresponding crystal planes in brackets. Some of the spectra are offset in intensity for a better comparability.

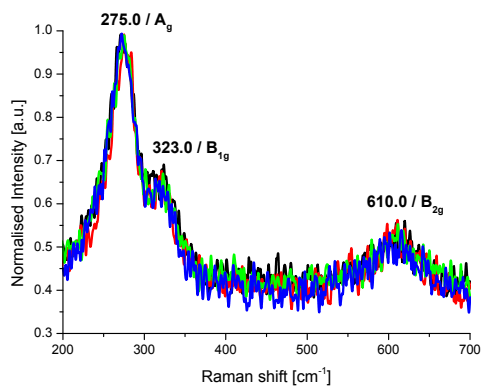

**Figure S6:** Normalised Raman spectra of CuO electrodes calcinated at 300 (black), 350 (red), 400 (green) and 500°C (blue) showing the three active raman modes  $A_g$ ,  $B_{1g}$  and  $B_{2g}$ .

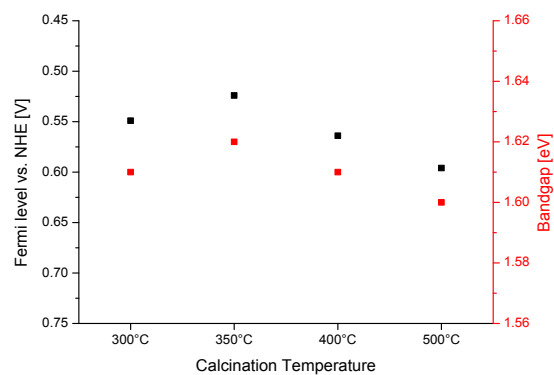

**Figure S7:** Variation of the Fermi level  $E_F$  (black) and the bandgap energy (red) for CuO electrodes calcinated at different temperatures.

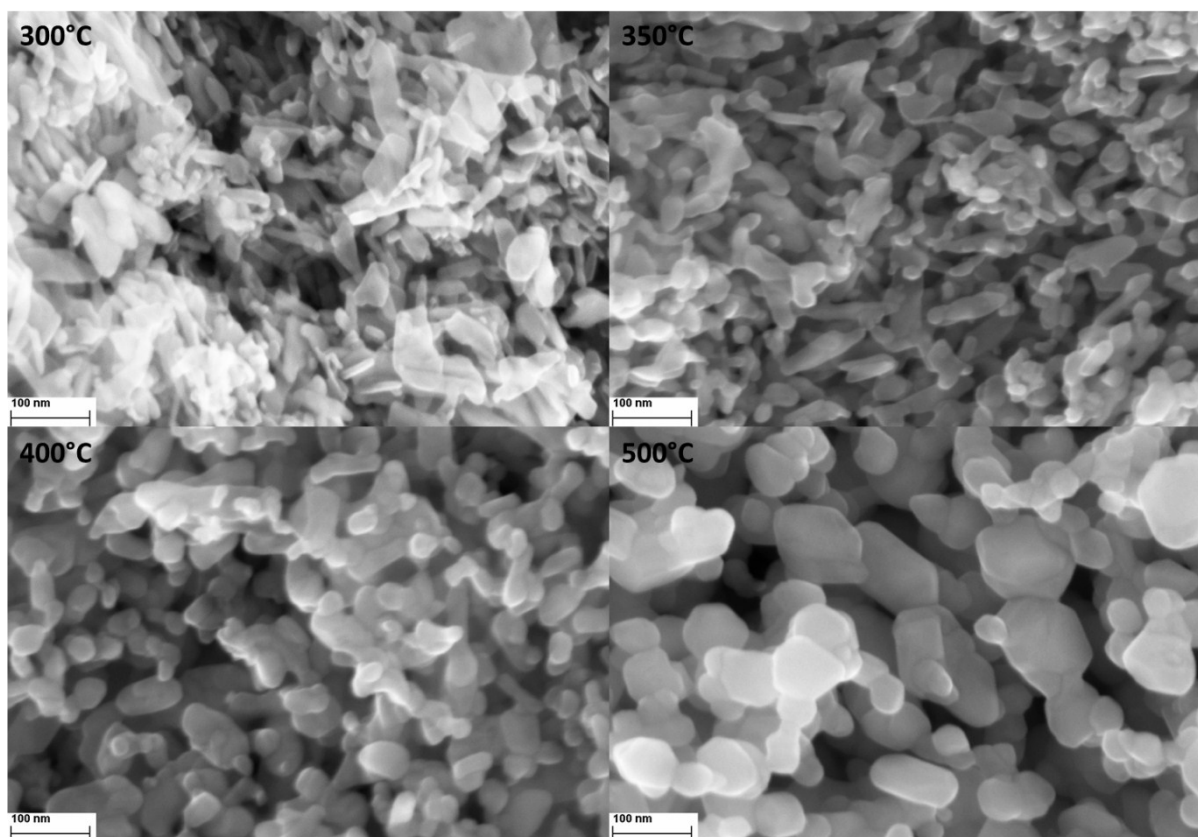

**Figure S8:** SEM images (150k magnification) of CuO electrodes calcinated at 300, 350, 400, and 500°C.

**Table S3:** Figures-of-merit of p-type CuO DSSCs for optimization of  $T_{\text{sint}}$ , the electrode thickness and the electrolyte ratio.

| Devices                                              |                |                        | Figures-of-merit                                  |                      |                                       |      |       |                         |
|------------------------------------------------------|----------------|------------------------|---------------------------------------------------|----------------------|---------------------------------------|------|-------|-------------------------|
| Sintering [°C]                                       | Thickness [μm] | I/I <sub>2</sub> ratio | Dye loading <sup>[a]</sup> [mol/cm <sup>2</sup> ] | V <sub>oc</sub> [mV] | J <sub>sc</sub> [mA/cm <sup>2</sup> ] | FF   | η [%] | IPCE <sup>[b]</sup> [%] |
| <b>Calcination temperature</b>                       |                |                        |                                                   |                      |                                       |      |       |                         |
| 300                                                  | 5.0            | 5:1                    | 4.3                                               | 92.6                 | 2.76                                  | 0.36 | 0.092 | 24.3                    |
| 350                                                  | 4.7            | 5:1                    | 3.8                                               | 92.6                 | 2.53                                  | 0.37 | 0.086 | 22.3                    |
| 400                                                  | 4.9            | 5:1                    | 3.0                                               | 92.6                 | 1.79                                  | 0.38 | 0.062 | 15.6                    |
| 500                                                  | 4.8            | 5:1                    | 1.3                                               | 97.5                 | 1.26                                  | 0.39 | 0.048 | 10.6                    |
| <b>Electrode thickness</b>                           |                |                        |                                                   |                      |                                       |      |       |                         |
| 300                                                  | 1.5            | 5:1                    | 0.9                                               | 112.2                | 2.01                                  | 0.38 | 0.087 | 17.7                    |
| 300                                                  | 5.0            | 5:1                    | 4.3                                               | 92.6                 | 2.76                                  | 0.36 | 0.092 | 24.3                    |
| 300                                                  | 9.0            | 5:1                    | 13.8                                              | 82.9                 | 3.08                                  | 0.34 | 0.087 | 25.5                    |
| <b>Electrolyte ratio I/I<sub>2</sub><sup>-</sup></b> |                |                        |                                                   |                      |                                       |      |       |                         |
| 300                                                  | 5.1            | 10:1                   | 4.3                                               | 95.1                 | 1.92                                  | 0.36 | 0.066 | 17.1                    |
| 300                                                  | 5.1            | 7.5:1                  | 4.3                                               | 99.9                 | 2.27                                  | 0.35 | 0.079 | 19.9                    |
| 300                                                  | 5.0            | 5:1                    | 4.3                                               | 92.6                 | 2.76                                  | 0.36 | 0.092 | 24.3                    |
| 300                                                  | 5.1            | 2.5:1                  | 4.3                                               | 87.7                 | 3.57                                  | 0.36 | 0.112 | 29.6                    |

[a] All values multiplied by 10<sup>-9</sup>, [b] IPCE at 670 nm



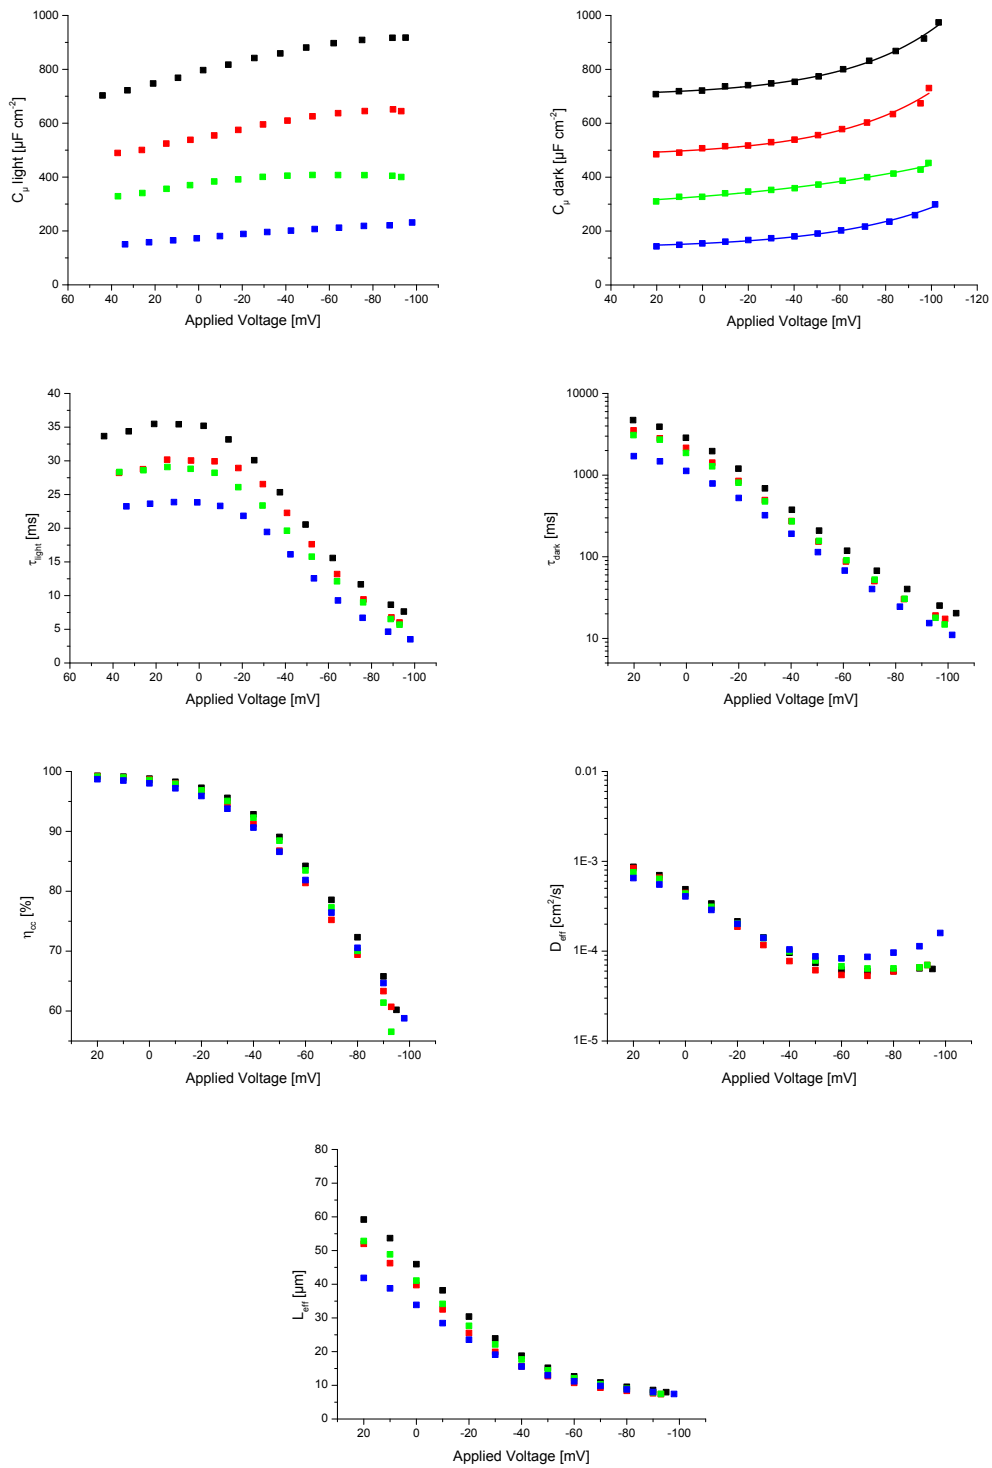

**Figure S9:** From top left to bottom right  $C_{\mu}^{\text{light}}$ ,  $C_{\mu}^{\text{dark}}$ ,  $\tau_{\text{light}}$ ,  $\tau_{\text{dark}}$ ,  $\eta_{\text{cc}}$ ,  $D_{\text{eff}}$  and  $L_{\text{eff}}$  all vs. applied voltage for the different calcination temperatures 300 (black), 350 (red), 400 (green) and

500°C (blue). The fits of  $C_{\mu}$  dark according to **Equation 9** are depicted as solid lines in the corresponding color.

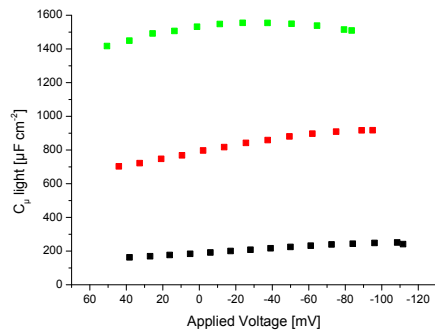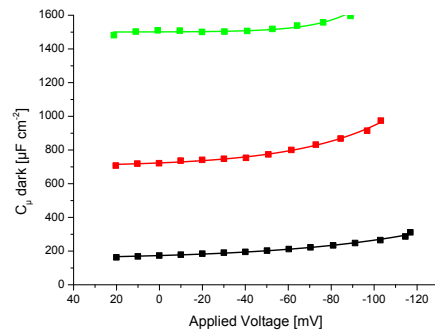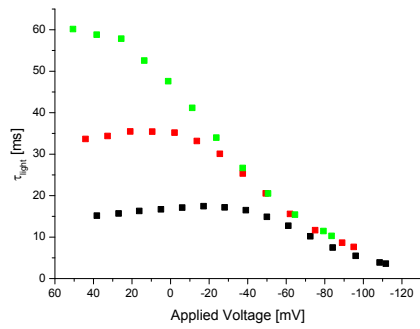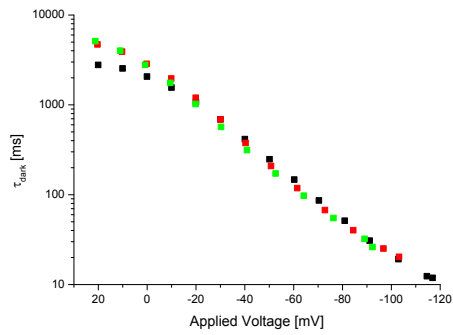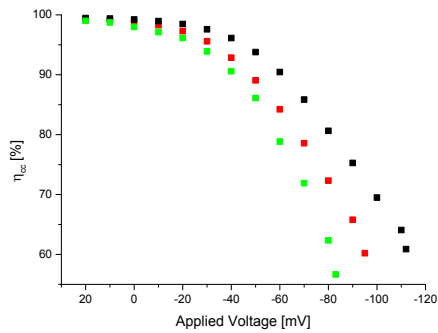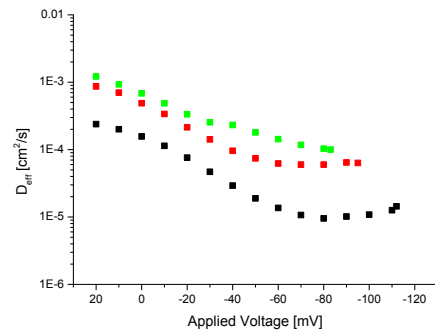

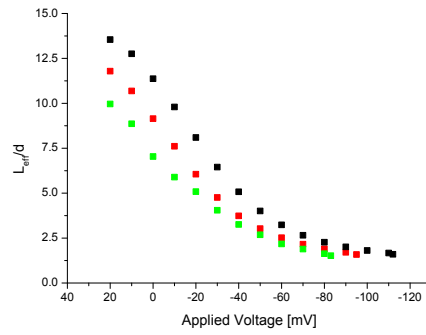

**Figure S10:** From top left to bottom right  $C_{\mu}$  light,  $C_{\mu}$  dark,  $\tau_{\text{light}}$ ,  $\tau_{\text{dark}}$ ,  $\eta_{\text{cc}}$ ,  $D_{\text{eff}}$  and  $L_{\text{eff}}/d$  all vs. applied voltage for the different film thicknesses 1.5  $\mu\text{m}$  (black), 5.0  $\mu\text{m}$  (red) and 9.0  $\mu\text{m}$  (green). The fits of  $C_{\mu}$  dark according to **Equation 9** are depicted as solid lines in the corresponding color.

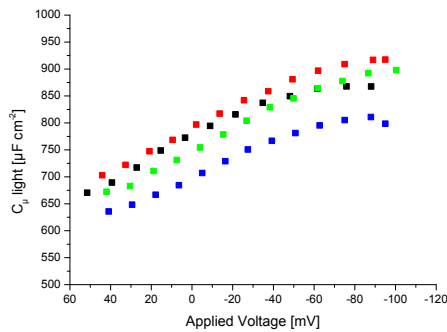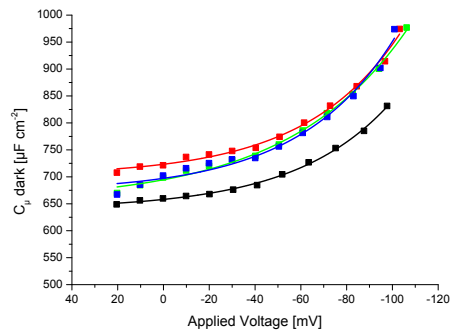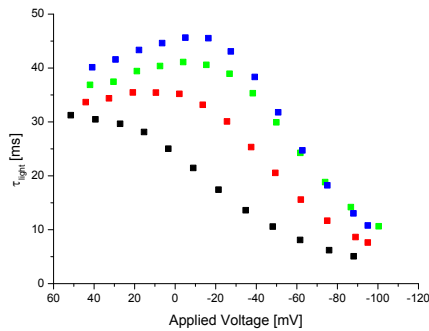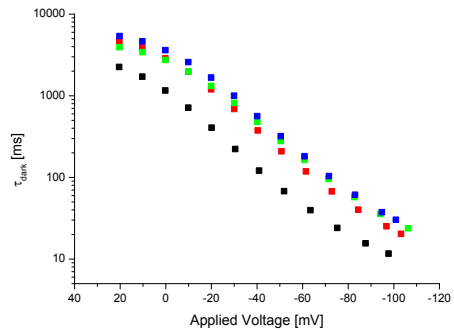

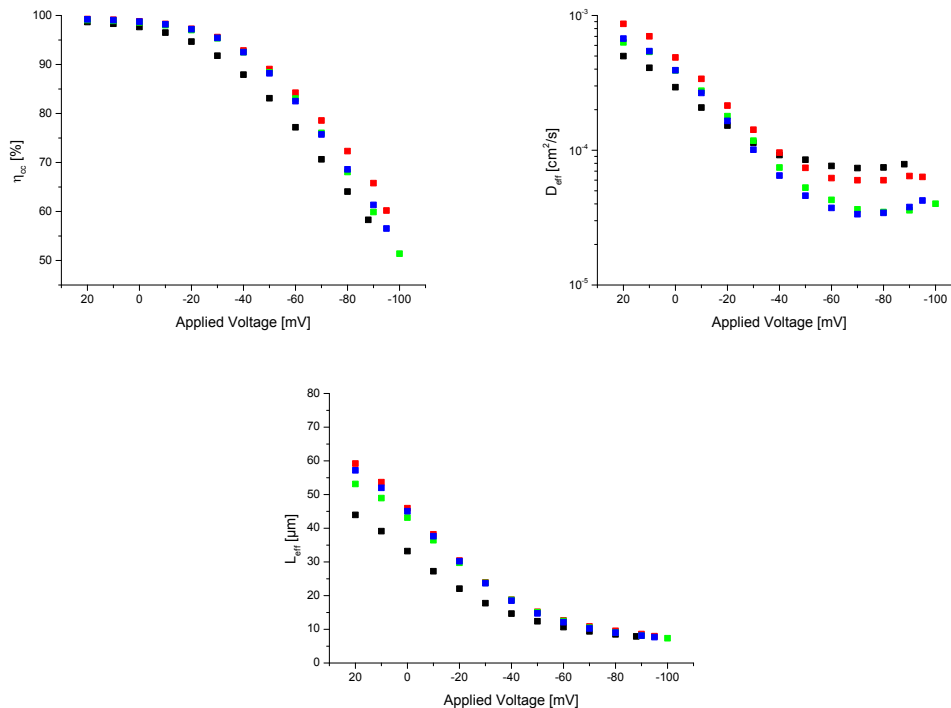

**Figure S11:** From top left to bottom right  $C_{\mu}$  light,  $C_{\mu}$  dark,  $\tau_{light}$ ,  $\tau_{dark}$ ,  $\eta_{cc}$ ,  $D_{eff}$  and  $L_{eff}$  all vs. applied voltage for the electrolyte ratios 2.5:1 (black), 5:1 (red), 7.5:1 (green) and 10:1 (blue). The fits of  $C_{\mu}$  dark according to **Equation 9** are depicted as solid lines in the corresponding color.

### Calculation of the redox potential:

In solution iodine will undergo an equilibrium reaction with iodide to form triiodide with the reaction constant  $k_1$  - Equation S1. Considering that  $k_1$  is very large in acetonitrile ( $\log(k_1/\text{M}^{-1}) = 6.76 \times 10^5$ ), basically all free iodine will react to triiodide.<sup>1</sup> From this we can approximate that the final triiodide concentration  $[\text{I}_3^-]$  is almost equal to the initial concentration of iodine  $[\text{I}_2]$ . Furthermore, for every mol  $\text{I}_3^-$  that has been formed, an equimolar amount of iodine  $[\text{I}^-]$  has been consumed – e.g., for an electrolyte with the initial concentrations of  $[\text{I}^-] = 1.0\text{M}$  and  $[\text{I}_2] = 0.1\text{M}$ , the final concentrations of the active redox species will be  $[\text{I}^-] = 0.9\text{M}$  and  $[\text{I}_3^-] = 0.1\text{M}$ . With Equation S1 and the aforementioned approximations at hand, we calculated the redox

potentials for the all the investigated electrolyte ratios. Equation S2 shows the redox reaction of the I<sup>-</sup>/I<sub>3</sub><sup>-</sup> redox couple from which we can establish the corresponding Nernst-equation – Equation S3. From this we can calculate the redox potential ( $E_{\text{redox}}$ ) of the investigated electrolytes using  $E^0 (\text{I}_3^-/\text{I}^-) = 0.354 \text{ V vs. NHE}$  – Table S4 :<sup>1</sup>

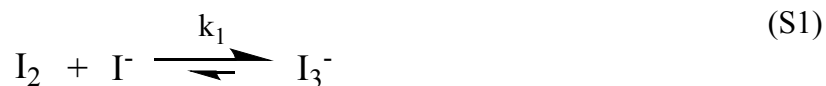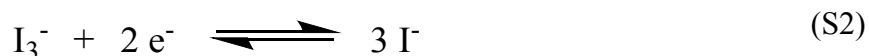

$$E_{\text{redox}} = E^0 + \frac{RT}{2F} \times \ln \frac{[\text{I}_3^-]}{[\text{I}^-]^3} \quad (\text{S3})$$

**Table S4:** Calculated redox potentials  $E_{\text{redox}}(\text{I}_3^-/\text{I}^-)$  for the investigated electrolyte ratios

| Ratio I:I <sub>2</sub> | [I <sub>3</sub> <sup>-</sup> ] in M <sup>[a]</sup> | [I <sup>-</sup> ] in M <sup>[a]</sup> | $E_{\text{redox}} (\text{I}_3^-/\text{I}^-)$ in V vs. NHE <sup>[b]</sup> |
|------------------------|----------------------------------------------------|---------------------------------------|--------------------------------------------------------------------------|
| 10:1                   | 0.1                                                | 0.9                                   | 0.331                                                                    |
| 7.5:1                  | 0.13                                               | 0.87                                  | 0.335                                                                    |
| 5:1                    | 0.2                                                | 0.8                                   | 0.343                                                                    |
| 2.5:1                  | 0.4                                                | 0.6                                   | 0.361                                                                    |

[a] Concentration of the redox species after reaching the equilibrium - Equation S2, [b] calculated according to Equation S3

## REFERENCES

- 1 G. Boschloo and A. Hagfeldt, *Acc. Chem. Res.*, 2009, **42**, 1819–1826.
